# Supplementary material
Source: PubMed Central journal article supplement (PMC3593612)
Supplement: ja312550k_si_001.pdf [file ja312550k_si_001.pdf]

Supporting Information to

**Mapping the nucleotide binding site of UCP1 using atomic force microscopy**

Rong Zhu<sup>1,3</sup>, Anne Rupprecht<sup>2,3</sup>, Andreas Ebner<sup>1</sup>, Thomas Haselgrübler<sup>4</sup>, Hermann  
J. Gruber<sup>1</sup>, Peter Hinterdorfer<sup>1</sup>, Elena E. Pohl<sup>2,3,@</sup>

<sup>1</sup>Institute for Biophysics, Johannes Kepler University, Linz, Austria;

<sup>2</sup>Institute of Physiology, Pathophysiology and Biophysics, University of Veterinary  
Medicine, Vienna, Austria,

<sup>3</sup>Institute of Cell Biology and Neurobiology, Charité – Universitaetsmedizin, Berlin,  
Germany;

<sup>4</sup>Center for Advanced Bioanalysis GmbH, Linz, Austria.

@Corresponding author: [elena.pohl@vedmeduni.ac.at](mailto:elena.pohl@vedmeduni.ac.at)

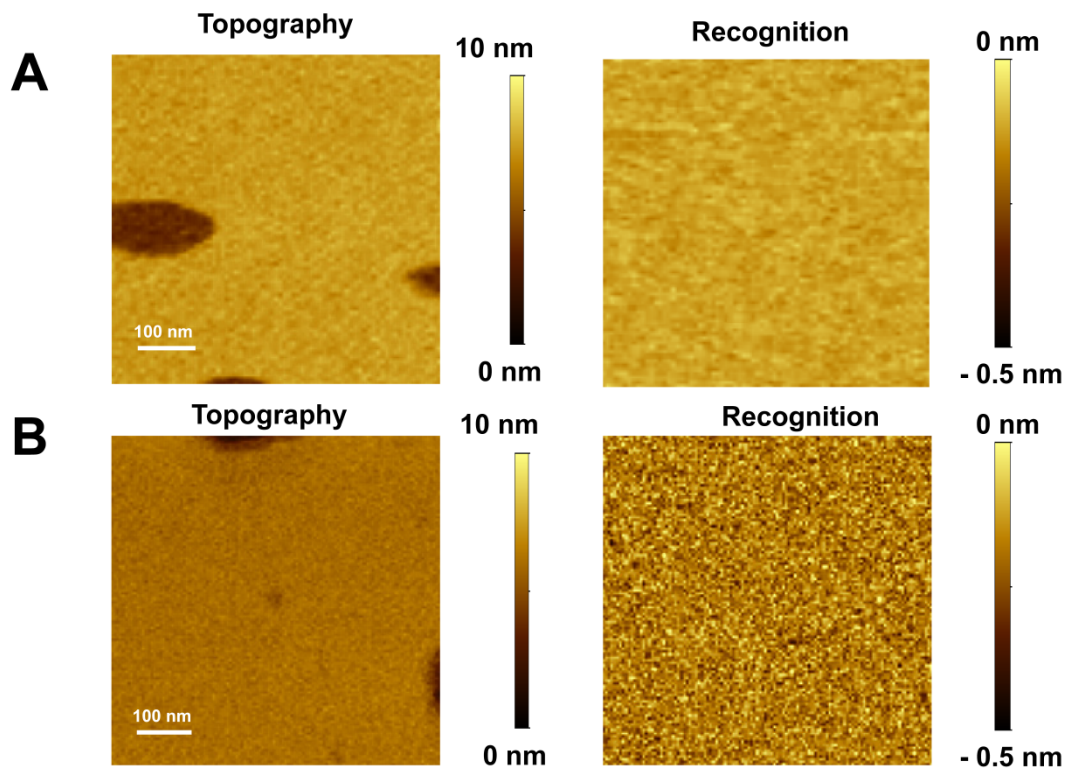

Figure S1. High resolution topography and recognition images of bilayer membrane without protein using tips functionalized with anti-UCP1 antibody (A) or with ATP (B).

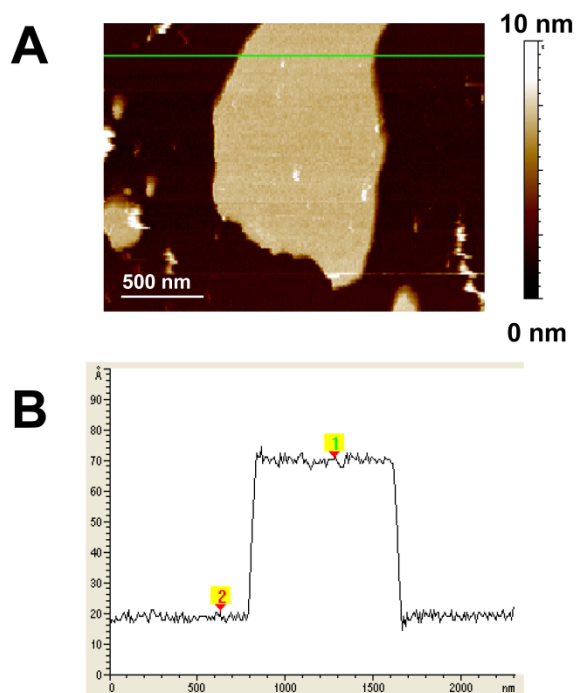

Figure S2. High resolution topography image showing the bilayer membrane on mica support (A) and a cross-section image for the estimation of the membrane thickness (approximately 5 nm, B).
